# Supplementary material for: Targeted Next-Generation Sequencing of Circulating Tumor DNA Mutations among Metastatic Breast Cancer Patients
Source: MDPI journal article supplement (doi:10.3390/curroncol28040214), 2021-06-24
Supplement: s1 [file s1]

Table S1. Details of the personalized target-capture sequencing panel.

| Chromosomes | Genes | Exons | Length (bp) |
|-------------|-------|-------|-------------|
| chr.1       | 98    | 109   | 14226       |
| chr.2       | 74    | 96    | 11947       |
| chr.3       | 45    | 54    | 8172        |
| chr.4       | 29    | 32    | 3099        |
| chr.5       | 42    | 54    | 7141        |
| chr.6       | 33    | 35    | 3932        |
| chr.7       | 34    | 37    | 3809        |
| chr.8       | 30    | 31    | 3080        |
| chr.9       | 33    | 36    | 3189        |
| chr.10      | 27    | 33    | 5001        |
| chr.11      | 41    | 43    | 3939        |
| chr.12      | 48    | 50    | 5587        |
| chr.13      | 13    | 14    | 1447        |
| chr.14      | 21    | 21    | 2012        |
| chr.15      | 26    | 27    | 2246        |
| chr.16      | 24    | 34    | 4130        |
| chr.17      | 51    | 67    | 6819        |
| chr.18      | 15    | 15    | 1540        |
| chr.19      | 60    | 65    | 16244       |
| chr.20      | 24    | 28    | 2853        |
| chr.21      | 5     | 8     | 941         |
| chr.22      | 14    | 14    | 1226        |
| chr.X       | 48    | 58    | 6618        |
| Total       | 835   | 961   | 119198      |

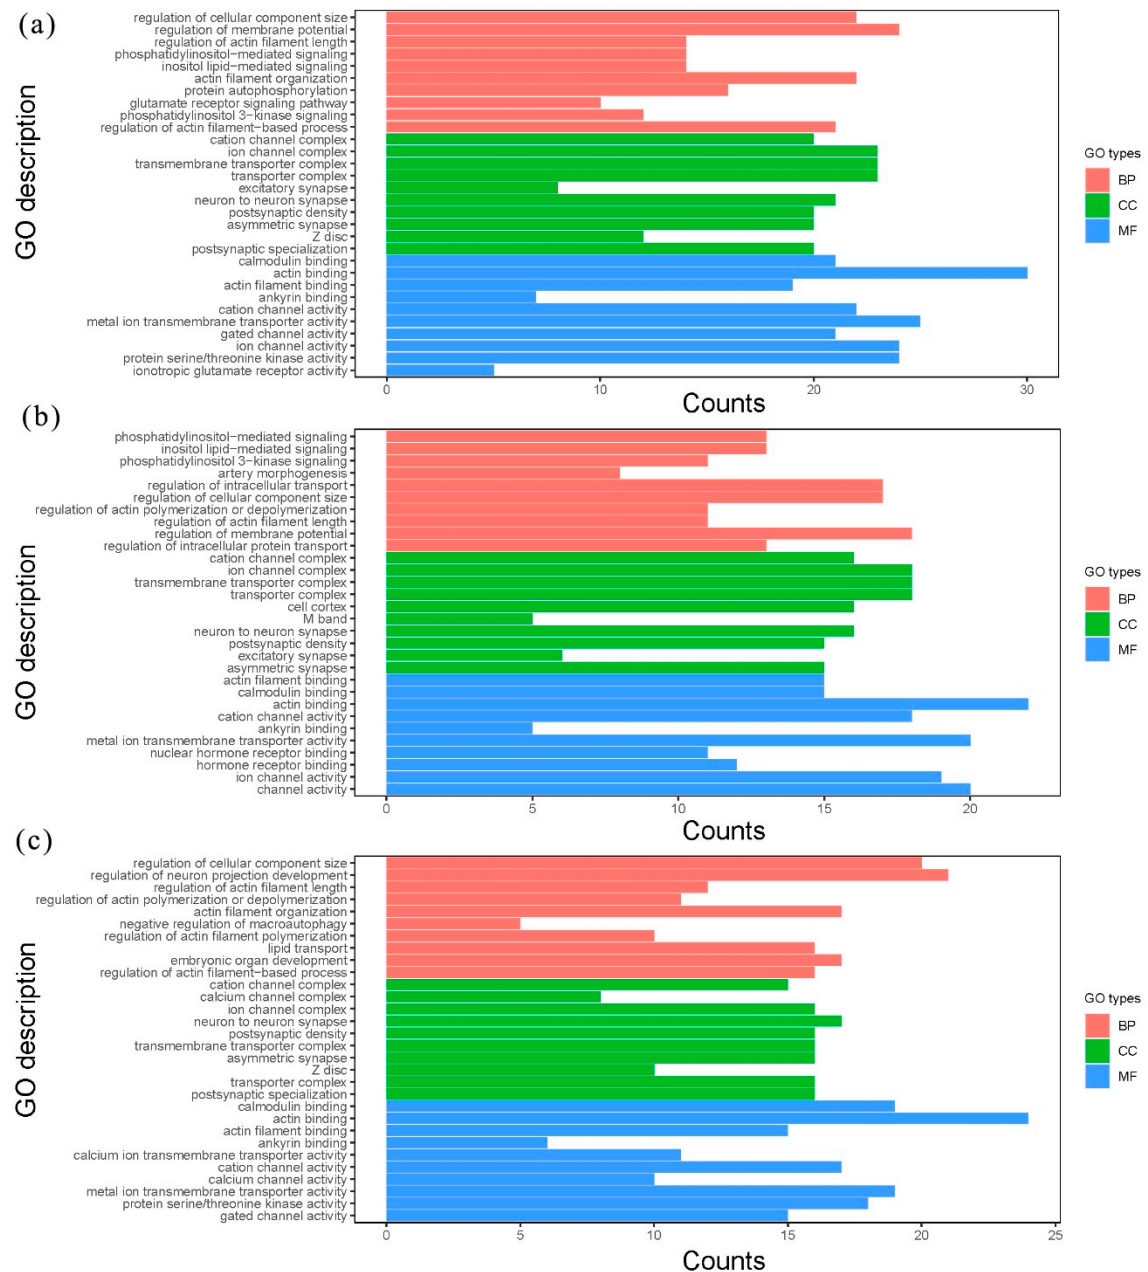

Figure S1. GO analyses for the mutated genes from three subsets. (a) GO analysis for overall mutated genes. (b) GO analysis for baseline mutated genes. (c) GO analysis for mutated genes from after chemotherapy. The length of each column indicates the number of enriched genes, which ranked according to statistical significance.

Table S2. Analyses for the distribution of ctDNA mutations for all patients

| clinical characteristics                                           | All genes |        |       | AQP7    |        |       | KRAS   |        |       | MAP3K1 |        |       | PGAP1 |        |       |
|--------------------------------------------------------------------|-----------|--------|-------|---------|--------|-------|--------|--------|-------|--------|--------|-------|-------|--------|-------|
|                                                                    | All       | Before | After | All     | Before | After | All    | Before | After | All    | Before | After | All   | Before | After |
| Diagnostic age, > 51 vs ≤51                                        | 0.269     | 0.139  | 0.954 | 0.335   | 0.249  | 0.650 | 0.039  | 0.018  | 0.363 | 0.759  | 0.495  | 0.959 | 0.291 | 0.766  | 0.085 |
| Menarche age, ≥14 vs < 14                                          | 0.355     | 0.722  | 0.044 | 0.320   | 0.555  | 0.272 | 0.289  | 0.953  | 0.354 | 0.031  | 0.006  | 0.201 | 0.003 | 0.008  | 0.109 |
| ER status, ER(+) vs ER(-)                                          | 0.304     | 0.235  | 0.867 | 0.880   | 0.395  | 0.635 | 0.557  | 0.230  | 0.677 | 0.822  | 0.380  | 0.740 | 0.720 | 0.393  | 0.699 |
| PR <sup>a</sup> status, PR <sup>a</sup> (+) vs PR <sup>a</sup> (-) | 0.319     | 0.241  | 0.989 | 0.202   | 0.023  | 0.318 | 0.525  | 0.789  | 0.384 | 0.896  | 0.693  | 0.584 | 0.523 | 0.460  | 0.889 |
| HER2 status, HER2(+) vs HER2(-)                                    | 0.029     | 0.022  | 0.639 | 0.389   | 0.432  | 0.223 | 0.469  | 0.041  | 0.439 | 0.968  | 0.826  | 0.966 | 0.083 | 0.130  | 0.257 |
| Size of tumor, >3cm vs ≤3cm                                        | 0.035     | 0.047  | 0.196 | 0.750   | 0.712  | 0.666 | 0.279  | 0.135  | 0.675 | 0.247  | 0.090  | 0.689 | 0.725 | 0.887  | 0.128 |
| Therapeutic effect, PR <sup>b</sup> /SD vs PD                      | 0.178     | 0.045  | 0.919 | 0.000   | 0.082  | 0.003 | 0.091  | 0.401  | 0.305 | 0.379  | 0.957  | 0.250 | 0.201 | 0.154  | 0.889 |
| Parturitions NO. ≥3 vs <3                                          | 0.684     | 0.551  | 0.968 | 0.746   | 0.190  | 0.852 | 0.497  | 0.435  | 0.124 | 0.701  | 0.237  | 0.818 | 0.796 | 0.804  | 0.889 |
| Menopause, YES vs NO                                               | 0.422     | 0.285  | 0.877 | 0.341   | 0.090  | 0.897 | 0.393  | 0.610  | 0.349 | 0.822  | 0.700  | 0.954 | 0.807 | 0.771  | 0.275 |
| clinical characteristics                                           | LUC7L2    |        |       | DNAJC11 |        |       | PIK3CA |        |       | PTEN   |        |       | TP53  |        |       |
|                                                                    | All       | Before | After | All     | Before | After | All    | Before | After | All    | Before | After | All   | Before | After |
| Diagnostic age, > 51 vs ≤51                                        | 0.454     | 0.472  | 0.832 | 0.095   | 0.334  | 0.082 | 0.188  | 0.236  | 0.564 | 0.175  | 0.401  | 0.305 | 0.138 | 0.170  | 0.970 |
| Menarche age, ≥14 vs < 14                                          | 0.454     | 0.109  | 0.832 | 0.019   | 0.334  | 0.689 | 0.848  | 0.474  | 0.096 | 1.000  | 0.500  | 0.569 | 0.074 | 0.453  | 0.068 |
| ER status, ER(+) vs ER(-)                                          | 0.081     | 0.074  | 0.074 | 0.716   | 0.332  | 0.083 | 0.382  | 0.005  | 0.144 | 1.000  | 0.703  | 0.580 | 0.768 | 0.760  | 0.166 |
| PR <sup>a</sup> status, PR <sup>a</sup> (+) vs PR <sup>a</sup> (-) | 0.397     | 0.382  | 0.382 | 0.944   | 0.333  | 0.083 | 0.449  | 0.194  | 0.722 | 0.814  | 0.542  | 0.450 | 0.305 | 0.494  | 0.024 |
| HER2 status, HER2(+) vs HER2(-)                                    | 0.083     | 0.363  | 0.020 | 0.795   | 0.332  | 0.351 | 0.104  | 0.030  | 0.647 | 0.100  | 0.180  | 0.243 | 0.677 | 0.449  | 0.011 |
| Size of tumor, >3cm vs ≤3cm                                        | 0.599     | 0.577  | 0.170 | 0.182   | 0.336  | 0.082 | 0.039  | 0.039  | 0.389 | 1.000  | 0.304  | 0.205 | 0.340 | 0.048  | 0.380 |
| Therapeutic effect, PR <sup>b</sup> /SD vs PD                      | 0.397     | 0.972  | 0.972 | 0.176   | 0.333  | 0.787 | 0.112  | 0.337  | 0.344 | 0.027  | 0.028  | 0.140 | 0.967 | 0.220  | 0.067 |
| Parturitions NO. ≥3 vs <3                                          | 0.787     | 0.382  | 0.280 | 0.517   | 0.333  | 0.397 | 0.785  | 0.406  | 0.020 | 0.426  | 0.868  | 0.061 | 0.837 | 0.822  | 0.770 |
| Menopause, YES vs NO                                               | 0.689     | 0.832  | 0.472 | 0.432   | 0.339  | 0.454 | 0.786  | 0.774  | 0.942 | 0.114  | 0.318  | 0.179 | 0.066 | 0.164  | 0.771 |

*P* value were shown in the table. All: analyses for all samples; Before: analyses for baseline samples. After: analyses for samples after three courses of treatment. Only mutated genes with statistical significance were shown. ER: estrogen receptor; <sup>a</sup>PR: progesterone receptor; HER2: human epidermal growth factor receptor 2; <sup>b</sup>PR: partial remission; SD: stable disease; PD: progressive disease

Table S3. GO analysis for the mutated genes of three subsets

| ID         | Subjects correlated with BP for all mutated genes (53)                                                             | Adjusted <i>P</i> value |
|------------|--------------------------------------------------------------------------------------------------------------------|-------------------------|
| GO:0032535 | regulation of cellular component size                                                                              | 0.018                   |
| GO:0042391 | regulation of membrane potential                                                                                   | 0.018                   |
| GO:0030832 | regulation of actin filament length                                                                                | 0.018                   |
| GO:0048015 | phosphatidylinositol-mediated signaling                                                                            | 0.018                   |
| GO:0048017 | inositol lipid-mediated signaling                                                                                  | 0.018                   |
| GO:0007015 | actin filament organization                                                                                        | 0.018                   |
| GO:0046777 | protein autophosphorylation                                                                                        | 0.018                   |
| GO:0007215 | glutamate receptor signaling pathway                                                                               | 0.020                   |
| GO:0014065 | phosphatidylinositol 3-kinase signaling                                                                            | 0.023                   |
| GO:0032970 | regulation of actin filament-based process                                                                         | 0.023                   |
| GO:0018108 | peptidyl-tyrosine phosphorylation                                                                                  | 0.025                   |
| GO:0018212 | peptidyl-tyrosine modification                                                                                     | 0.026                   |
| GO:0008064 | regulation of actin polymerization or depolymerization                                                             | 0.026                   |
| GO:0051899 | membrane depolarization                                                                                            | 0.026                   |
| GO:0010975 | regulation of neuron projection development                                                                        | 0.026                   |
| GO:0050805 | negative regulation of synaptic transmission                                                                       | 0.026                   |
| GO:0030239 | myofibril assembly                                                                                                 | 0.026                   |
| GO:0035249 | synaptic transmission, glutamatergic                                                                               | 0.026                   |
| GO:0051146 | striated muscle cell differentiation                                                                               | 0.026                   |
| GO:0030833 | regulation of actin filament polymerization                                                                        | 0.026                   |
| GO:0035235 | ionotropic glutamate receptor signaling pathway                                                                    | 0.026                   |
| GO:1902903 | regulation of supramolecular fiber organization                                                                    | 0.026                   |
| GO:0043242 | negative regulation of protein-containing complex disassembly                                                      | 0.027                   |
| GO:0048844 | artery morphogenesis                                                                                               | 0.027                   |
| GO:0055003 | cardiac myofibril assembly                                                                                         | 0.027                   |
| GO:0034765 | regulation of ion transmembrane transport                                                                          | 0.028                   |
| GO:0006936 | muscle contraction                                                                                                 | 0.030                   |
| GO:0051494 | negative regulation of cytoskeleton organization                                                                   | 0.035                   |
| GO:0055002 | striated muscle cell development                                                                                   | 0.035                   |
| GO:0048706 | embryonic skeletal system development                                                                              | 0.037                   |
| GO:0032956 | regulation of actin cytoskeleton organization                                                                      | 0.037                   |
| GO:0048701 | embryonic cranial skeleton morphogenesis                                                                           | 0.037                   |
| GO:1901879 | regulation of protein depolymerization                                                                             | 0.037                   |
| GO:0006978 | DNA damage response, signal transduction by p53 class mediator<br>resulting in transcription of p21 class mediator | 0.037                   |
| GO:0031000 | response to caffeine                                                                                               | 0.037                   |
| GO:0036270 | response to diuretic                                                                                               | 0.037                   |
| GO:0110053 | regulation of actin filament organization                                                                          | 0.037                   |
| GO:0048738 | cardiac muscle tissue development                                                                                  | 0.037                   |
| GO:0060292 | long-term synaptic depression                                                                                      | 0.038                   |
| GO:0030041 | actin filament polymerization                                                                                      | 0.038                   |
| GO:0008154 | actin polymerization or depolymerization                                                                           | 0.038                   |
| GO:1901880 | negative regulation of protein depolymerization                                                                    | 0.038                   |

| GO:1904888 | cranial skeletal system development                                 | 0.038            |
|------------|---------------------------------------------------------------------|------------------|
| GO:0042692 | muscle cell differentiation                                         | 0.038            |
| GO:0051261 | protein depolymerization                                            | 0.038            |
| GO:0042772 | DNA damage response, signal transduction resulting in transcription | 0.038            |
| GO:0055001 | muscle cell development                                             | 0.042            |
| GO:0055013 | cardiac muscle cell development                                     | 0.042            |
| GO:0016242 | negative regulation of macroautophagy                               | 0.044            |
| GO:0043244 | regulation of protein-containing complex disassembly                | 0.045            |
| GO:0048568 | embryonic organ development                                         | 0.047            |
| GO:0006814 | sodium ion transport                                                | 0.047            |
| GO:0010927 | cellular component assembly involved in morphogenesis               | 0.048            |
| ID         | Subjects correlated with CC for all mutated genes (43)              | Adjusted P value |
| GO:0034703 | cation channel complex                                              | 0.000            |
| GO:0034702 | ion channel complex                                                 | 0.000            |
| GO:1902495 | transmembrane transporter complex                                   | 0.000            |
| GO:1990351 | transporter complex                                                 | 0.000            |
| GO:0060076 | excitatory synapse                                                  | 0.001            |
| GO:0098984 | neuron to neuron synapse                                            | 0.001            |
| GO:0014069 | postsynaptic density                                                | 0.001            |
| GO:0032279 | asymmetric synapse                                                  | 0.001            |
| GO:0030018 | Z disc                                                              | 0.001            |
| GO:0099572 | postsynaptic specialization                                         | 0.001            |
| GO:0031674 | I band                                                              | 0.001            |
| GO:0034704 | calcium channel complex                                             | 0.002            |
| GO:0008328 | ionotropic glutamate receptor complex                               | 0.002            |
| GO:0034706 | sodium channel complex                                              | 0.003            |
| GO:0098878 | neurotransmitter receptor complex                                   | 0.003            |
| GO:0005938 | cell cortex                                                         | 0.005            |
| GO:0030016 | myofibril                                                           | 0.005            |
| GO:0005925 | focal adhesion                                                      | 0.005            |
| GO:0016528 | sarcoplasm                                                          | 0.005            |
| GO:0031430 | M band                                                              | 0.005            |
| GO:0030017 | sarcomere                                                           | 0.005            |
| GO:0098688 | parallel fiber to Purkinje cell synapse                             | 0.005            |
| GO:0005875 | microtubule associated complex                                      | 0.005            |
| GO:0030055 | cell-substrate junction                                             | 0.005            |
| GO:0043292 | contractile fiber                                                   | 0.005            |
| GO:0031252 | cell leading edge                                                   | 0.009            |
| GO:0098686 | hippocampal mossy fiber to CA3 synapse                              | 0.009            |
| GO:0098793 | presynapse                                                          | 0.015            |
| GO:0031672 | A band                                                              | 0.016            |
| GO:0033017 | sarcoplasmic reticulum membrane                                     | 0.016            |
| GO:0043204 | perikaryon                                                          | 0.023            |
| GO:0098978 | glutamatergic synapse                                               | 0.027            |

| GO:0030864 | cortical actin cytoskeleton                                                | 0.030                   |
|------------|----------------------------------------------------------------------------|-------------------------|
| GO:0045211 | postsynaptic membrane                                                      | 0.030                   |
| GO:0031256 | leading edge membrane                                                      | 0.030                   |
| GO:0030863 | cortical cytoskeleton                                                      | 0.030                   |
| GO:0001518 | voltage-gated sodium channel complex                                       | 0.032                   |
| GO:0097060 | synaptic membrane                                                          | 0.034                   |
| GO:0005604 | basement membrane                                                          | 0.034                   |
| GO:0016529 | sarcoplasmic reticulum                                                     | 0.034                   |
| GO:0033116 | endoplasmic reticulum-Golgi intermediate compartment<br>membrane           | 0.034                   |
| GO:0062023 | collagen-containing extracellular matrix                                   | 0.038                   |
| GO:0070603 | SWI/SNF superfamily-type complex                                           | 0.046                   |
| ID         | Subjects correlated with MF for all mutated genes (28)                     | Adjusted <i>P</i> value |
| GO:0005516 | calmodulin binding                                                         | 0.000                   |
| GO:0003779 | actin binding                                                              | 0.000                   |
| GO:0051015 | actin filament binding                                                     | 0.000                   |
| GO:0030506 | ankyrin binding                                                            | 0.000                   |
| GO:0005261 | cation channel activity                                                    | 0.001                   |
| GO:0046873 | metal ion transmembrane transporter activity                               | 0.001                   |
| GO:0022836 | gated channel activity                                                     | 0.002                   |
| GO:0005216 | ion channel activity                                                       | 0.002                   |
| GO:0004674 | protein serine/threonine kinase activity                                   | 0.002                   |
| GO:0004970 | ionotropic glutamate receptor activity                                     | 0.002                   |
| GO:0015267 | channel activity                                                           | 0.002                   |
| GO:0022803 | passive transmembrane transporter activity                                 | 0.002                   |
| GO:0015085 | calcium ion transmembrane transporter activity                             | 0.002                   |
| GO:0051427 | hormone receptor binding                                                   | 0.002                   |
| GO:0008307 | structural constituent of muscle                                           | 0.002                   |
| GO:0005200 | structural constituent of cytoskeleton                                     | 0.003                   |
| GO:0005262 | calcium channel activity                                                   | 0.003                   |
| GO:0035257 | nuclear hormone receptor binding                                           | 0.004                   |
| GO:0008066 | glutamate receptor activity                                                | 0.009                   |
| GO:0061629 | RNA polymerase II-specific DNA-binding transcription factor<br>binding     | 0.013                   |
| GO:0030165 | PDZ domain binding                                                         | 0.017                   |
| GO:0004713 | protein tyrosine kinase activity                                           | 0.021                   |
| GO:0019838 | growth factor binding                                                      | 0.023                   |
| GO:0005201 | extracellular matrix structural constituent                                | 0.024                   |
| GO:0008331 | high voltage-gated calcium channel activity                                | 0.028                   |
| GO:0140297 | DNA-binding transcription factor binding                                   | 0.043                   |
| GO:0005272 | sodium channel activity                                                    | 0.043                   |
| GO:0030020 | extracellular matrix structural constituent conferring tensile<br>strength | 0.043                   |
| ID         | Subjects correlated with BP for baseline (42)                              | Adjusted <i>P</i> value |
| GO:0048015 | phosphatidylinositol-mediated signaling                                    | 0.007                   |

| GO:0048017 | inositol lipid-mediated signaling                                                                                  | 0.007            |
|------------|--------------------------------------------------------------------------------------------------------------------|------------------|
| GO:0014065 | phosphatidylinositol 3-kinase signaling                                                                            | 0.015            |
| GO:0048844 | artery morphogenesis                                                                                               | 0.015            |
| GO:0032386 | regulation of intracellular transport                                                                              | 0.023            |
| GO:0032535 | regulation of cellular component size                                                                              | 0.023            |
| GO:0008064 | regulation of actin polymerization or depolymerization                                                             | 0.025            |
| GO:0030832 | regulation of actin filament length                                                                                | 0.025            |
| GO:0042391 | regulation of membrane potential                                                                                   | 0.025            |
| GO:0033157 | regulation of intracellular protein transport                                                                      | 0.025            |
| GO:0006978 | DNA damage response, signal transduction by p53 class mediator<br>resulting in transcription of p21 class mediator | 0.025            |
| GO:0007015 | actin filament organization                                                                                        | 0.025            |
| GO:0006814 | sodium ion transport                                                                                               | 0.025            |
| GO:0034765 | regulation of ion transmembrane transport                                                                          | 0.025            |
| GO:0016242 | negative regulation of macroautophagy                                                                              | 0.025            |
| GO:0060840 | artery development                                                                                                 | 0.025            |
| GO:0042772 | DNA damage response, signal transduction resulting in<br>transcription                                             | 0.025            |
| GO:0051146 | striated muscle cell differentiation                                                                               | 0.025            |
| GO:0110053 | regulation of actin filament organization                                                                          | 0.027            |
| GO:0030833 | regulation of actin filament polymerization                                                                        | 0.027            |
| GO:2000310 | regulation of NMDA receptor activity                                                                               | 0.030            |
| GO:0032956 | regulation of actin cytoskeleton organization                                                                      | 0.031            |
| GO:0032970 | regulation of actin filament-based process                                                                         | 0.035            |
| GO:1902903 | regulation of supramolecular fiber organization                                                                    | 0.038            |
| GO:0008154 | actin polymerization or depolymerization                                                                           | 0.039            |
| GO:0032008 | positive regulation of TOR signaling                                                                               | 0.039            |
| GO:0043010 | camera-type eye development                                                                                        | 0.039            |
| GO:0018108 | peptidyl-tyrosine phosphorylation                                                                                  | 0.041            |
| GO:0055013 | cardiac muscle cell development                                                                                    | 0.041            |
| GO:0097306 | cellular response to alcohol                                                                                       | 0.041            |
| GO:1900449 | regulation of glutamate receptor signaling pathway                                                                 | 0.041            |
| GO:0018212 | peptidyl-tyrosine modification                                                                                     | 0.041            |
| GO:0030041 | actin filament polymerization                                                                                      | 0.041            |
| GO:0060537 | muscle tissue development                                                                                          | 0.041            |
| GO:0051899 | membrane depolarization                                                                                            | 0.041            |
| GO:0035249 | synaptic transmission, glutamatergic                                                                               | 0.046            |
| GO:0030241 | skeletal muscle myosin thick filament assembly                                                                     | 0.046            |
| GO:0071688 | striated muscle myosin thick filament assembly                                                                     | 0.046            |
| GO:0072659 | protein localization to plasma membrane                                                                            | 0.046            |
| GO:0055006 | cardiac cell development                                                                                           | 0.046            |
| GO:0031929 | TOR signaling                                                                                                      | 0.046            |
| GO:0055003 | cardiac myofibril assembly                                                                                         | 0.046            |
| ID         | Subjects correlated with CC for baseline (33)                                                                      | Adjusted P value |
| GO:0034703 | cation channel complex                                                                                             | 0.000            |

| GO:0034702 | ion channel complex                           | 0.000            |
|------------|-----------------------------------------------|------------------|
| GO:1902495 | transmembrane transporter complex             | 0.000            |
| GO:1990351 | transporter complex                           | 0.000            |
| GO:0005938 | cell cortex                                   | 0.001            |
| GO:0031430 | M band                                        | 0.003            |
| GO:0098984 | neuron to neuron synapse                      | 0.003            |
| GO:0014069 | postsynaptic density                          | 0.003            |
| GO:0060076 | excitatory synapse                            | 0.003            |
| GO:0032279 | asymmetric synapse                            | 0.003            |
| GO:0099572 | postsynaptic specialization                   | 0.006            |
| GO:0031672 | A band                                        | 0.008            |
| GO:0098793 | presynapse                                    | 0.008            |
| GO:0030863 | cortical cytoskeleton                         | 0.008            |
| GO:0034706 | sodium channel complex                        | 0.008            |
| GO:0030864 | cortical actin cytoskeleton                   | 0.008            |
| GO:0030018 | Z disc                                        | 0.015            |
| GO:0031256 | leading edge membrane                         | 0.018            |
| GO:0008328 | ionotropic glutamate receptor complex         | 0.018            |
| GO:0098878 | neurotransmitter receptor complex             | 0.019            |
| GO:0001518 | voltage-gated sodium channel complex          | 0.019            |
| GO:0031674 | I band                                        | 0.020            |
| GO:0098686 | hippocampal mossy fiber to CA3 synapse        | 0.024            |
| GO:0097060 | synaptic membrane                             | 0.024            |
| GO:0098688 | parallel fiber to Purkinje cell synapse       | 0.024            |
| GO:0031252 | cell leading edge                             | 0.033            |
| GO:0042734 | presynaptic membrane                          | 0.035            |
| GO:0045211 | postsynaptic membrane                         | 0.035            |
| GO:0016514 | SWI/SNF complex                               | 0.035            |
| GO:0034704 | calcium channel complex                       | 0.035            |
| GO:0031253 | cell projection membrane                      | 0.035            |
| GO:0030017 | sarcomere                                     | 0.036            |
| GO:0031258 | lamellipodium membrane                        | 0.048            |
| ID         | Subjects correlated with MF for baseline (32) | Adjusted P value |
| GO:0051015 | actin filament binding                        | 0.000            |
| GO:0005516 | calmodulin binding                            | 0.000            |
| GO:0003779 | actin binding                                 | 0.000            |
| GO:0005261 | cation channel activity                       | 0.001            |
| GO:0030506 | ankyrin binding                               | 0.001            |
| GO:0046873 | metal ion transmembrane transporter activity  | 0.002            |
| GO:0035257 | nuclear hormone receptor binding              | 0.002            |
| GO:0051427 | hormone receptor binding                      | 0.002            |
| GO:0005216 | ion channel activity                          | 0.003            |
| GO:0015267 | channel activity                              | 0.003            |
| GO:0022803 | passive transmembrane transporter activity    | 0.003            |
| GO:0022836 | gated channel activity                        | 0.004            |



| GO:0061629 | RNA polymerase II-specific DNA-binding transcription factor binding | 0.005            |
|------------|---------------------------------------------------------------------|------------------|
| GO:0005200 | structural constituent of cytoskeleton                              | 0.007            |
| GO:0140297 | DNA-binding transcription factor binding                            | 0.015            |
| GO:0008331 | high voltage-gated calcium channel activity                         | 0.015            |
| GO:0004674 | protein serine/threonine kinase activity                            | 0.017            |
| GO:0005262 | calcium channel activity                                            | 0.020            |
| GO:0008307 | structural constituent of muscle                                    | 0.020            |
| GO:0042805 | actinin binding                                                     | 0.020            |
| GO:0005201 | extracellular matrix structural constituent                         | 0.025            |
| GO:0005244 | voltage-gated ion channel activity                                  | 0.025            |
| GO:0022832 | voltage-gated channel activity                                      | 0.025            |
| GO:0019838 | growth factor binding                                               | 0.031            |
| GO:0015085 | calcium ion transmembrane transporter activity                      | 0.033            |
| GO:0016922 | nuclear receptor binding                                            | 0.035            |
| GO:0032794 | GTPase activating protein binding                                   | 0.037            |
| GO:0003777 | microtubule motor activity                                          | 0.039            |
| GO:0043178 | alcohol binding                                                     | 0.040            |
| GO:0051393 | alpha-actinin binding                                               | 0.046            |
| GO:0008569 | ATP-dependent microtubule motor activity, minus-end-directed        | 0.046            |
| GO:0005543 | phospholipid binding                                                | 0.049            |
| ID         | Subjects correlated with BP after chemotherapy (33)                 | Adjusted P value |
| GO:0032535 | regulation of cellular component size                               | 0.001            |
| GO:0010975 | regulation of neuron projection development                         | 0.013            |
| GO:0030832 | regulation of actin filament length                                 | 0.013            |
| GO:0008064 | regulation of actin polymerization or depolymerization              | 0.046            |
| GO:0007015 | actin filament organization                                         | 0.046            |
| GO:0016242 | negative regulation of macroautophagy                               | 0.049            |
| GO:0030833 | regulation of actin filament polymerization                         | 0.049            |
| GO:0006869 | lipid transport                                                     | 0.049            |
| GO:0048568 | embryonic organ development                                         | 0.049            |
| GO:0032970 | regulation of actin filament-based process                          | 0.049            |
| GO:0042391 | regulation of membrane potential                                    | 0.049            |
| GO:0008154 | actin polymerization or depolymerization                            | 0.049            |
| GO:0010038 | response to metal ion                                               | 0.049            |
| GO:0006936 | muscle contraction                                                  | 0.049            |
| GO:0051592 | response to calcium ion                                             | 0.049            |
| GO:0048015 | phosphatidylinositol-mediated signaling                             | 0.049            |
| GO:0030041 | actin filament polymerization                                       | 0.049            |
| GO:0010528 | regulation of transposition                                         | 0.049            |
| GO:0010529 | negative regulation of transposition                                | 0.049            |
| GO:0010876 | lipid localization                                                  | 0.049            |
| GO:0048017 | inositol lipid-mediated signaling                                   | 0.049            |
| GO:0051899 | membrane depolarization                                             | 0.049            |
| GO:0071313 | cellular response to caffeine                                       | 0.049            |

| GO:0001704 | formation of primary germ layer                                                                  | 0.049                   |
|------------|--------------------------------------------------------------------------------------------------|-------------------------|
| GO:0010881 | regulation of cardiac muscle contraction by regulation of the release of sequestered calcium ion | 0.049                   |
| GO:1904888 | cranial skeletal system development                                                              | 0.049                   |
| GO:0048704 | embryonic skeletal system morphogenesis                                                          | 0.049                   |
| GO:0110053 | regulation of actin filament organization                                                        | 0.049                   |
| GO:0031929 | TOR signaling                                                                                    | 0.049                   |
| GO:0048701 | embryonic cranial skeleton morphogenesis                                                         | 0.049                   |
| GO:0086016 | AV node cell action potential                                                                    | 0.049                   |
| GO:0086027 | AV node cell to bundle of His cell signaling                                                     | 0.049                   |
| GO:0048010 | vascular endothelial growth factor receptor signaling pathway                                    | 0.049                   |
| ID         | Subjects correlated with CC after chemotherapy (38)                                              | Adjusted <i>P</i> value |
| GO:0034703 | cation channel complex                                                                           | 0.000                   |
| GO:0034704 | calcium channel complex                                                                          | 0.001                   |
| GO:0034702 | ion channel complex                                                                              | 0.001                   |
| GO:0098984 | neuron to neuron synapse                                                                         | 0.001                   |
| GO:0014069 | postsynaptic density                                                                             | 0.001                   |
| GO:1902495 | transmembrane transporter complex                                                                | 0.001                   |
| GO:0032279 | asymmetric synapse                                                                               | 0.001                   |
| GO:0030018 | Z disc                                                                                           | 0.001                   |
| GO:1990351 | transporter complex                                                                              | 0.001                   |
| GO:0099572 | postsynaptic specialization                                                                      | 0.001                   |
| GO:0031674 | I band                                                                                           | 0.001                   |
| GO:0031252 | cell leading edge                                                                                | 0.002                   |
| GO:0030016 | myofibril                                                                                        | 0.002                   |
| GO:0098686 | hippocampal mossy fiber to CA3 synapse                                                           | 0.003                   |
| GO:0043292 | contractile fiber                                                                                | 0.003                   |
| GO:0030017 | sarcomere                                                                                        | 0.004                   |
| GO:0034706 | sodium channel complex                                                                           | 0.007                   |
| GO:0030027 | lamellipodium                                                                                    | 0.009                   |
| GO:0043204 | perikaryon                                                                                       | 0.013                   |
| GO:0016528 | sarcoplasm                                                                                       | 0.019                   |
| GO:0098978 | glutamatergic synapse                                                                            | 0.025                   |
| GO:0005938 | cell cortex                                                                                      | 0.025                   |
| GO:0005875 | microtubule associated complex                                                                   | 0.025                   |
| GO:0043025 | neuronal cell body                                                                               | 0.028                   |
| GO:0005925 | focal adhesion                                                                                   | 0.028                   |
| GO:0042734 | presynaptic membrane                                                                             | 0.030                   |
| GO:0030055 | cell-substrate junction                                                                          | 0.030                   |
| GO:0045211 | postsynaptic membrane                                                                            | 0.030                   |
| GO:0033017 | sarcoplasmic reticulum membrane                                                                  | 0.031                   |
| GO:0098858 | actin-based cell projection                                                                      | 0.037                   |
| GO:0031256 | leading edge membrane                                                                            | 0.037                   |
| GO:0000118 | histone deacetylase complex                                                                      | 0.037                   |
| GO:0097060 | synaptic membrane                                                                                | 0.037                   |

| GO:0042383 | sarcolemma                                          | 0.037                   |
|------------|-----------------------------------------------------|-------------------------|
| GO:0005891 | voltage-gated calcium channel complex               | 0.037                   |
| GO:0005770 | late endosome                                       | 0.038                   |
| GO:0031258 | lamellipodium membrane                              | 0.040                   |
| GO:0070603 | SWI/SNF superfamily-type complex                    | 0.047                   |
| ID         | Subjects correlated with MF after chemotherapy (20) | Adjusted <i>P</i> value |
| GO:0005516 | calmodulin binding                                  | 0.000                   |
| GO:0003779 | actin binding                                       | 0.000                   |
| GO:0051015 | actin filament binding                              | 0.000                   |
| GO:0030506 | ankyrin binding                                     | 0.000                   |
| GO:0015085 | calcium ion transmembrane transporter activity      | 0.001                   |
| GO:0005261 | cation channel activity                             | 0.001                   |
| GO:0005262 | calcium channel activity                            | 0.001                   |
| GO:0046873 | metal ion transmembrane transporter activity        | 0.003                   |
| GO:0004674 | protein serine/threonine kinase activity            | 0.008                   |
| GO:0022836 | gated channel activity                              | 0.013                   |
| GO:0015267 | channel activity                                    | 0.015                   |
| GO:0022803 | passive transmembrane transporter activity          | 0.015                   |
| GO:0005216 | ion channel activity                                | 0.015                   |
| GO:0008331 | high voltage-gated calcium channel activity         | 0.015                   |
| GO:0004712 | protein serine/threonine/tyrosine kinase activity   | 0.017                   |
| GO:0008307 | structural constituent of muscle                    | 0.022                   |
| GO:0005245 | voltage-gated calcium channel activity              | 0.025                   |
| GO:0005200 | structural constituent of cytoskeleton              | 0.028                   |
| GO:0031432 | titin binding                                       | 0.032                   |
| GO:0032794 | GTPase activating protein binding                   | 0.046                   |

BP: biological process; CC: cellular component; MF: molecular function.

Subjects were ranked according to statistical significance.

Table S4. KEGG analysis for the mutated genes of three subsets

| ID       | Pathways for all mutated genes (108)                   | Adjusted <i>P</i> value |
|----------|--------------------------------------------------------|-------------------------|
| hsa05222 | Small cell lung cancer                                 | 0.000                   |
| hsa01521 | EGFR tyrosine kinase inhibitor resistance              | 0.000                   |
| hsa05213 | Endometrial cancer                                     | 0.000                   |
| hsa04935 | Growth hormone synthesis, secretion and action         | 0.000                   |
| hsa04020 | Calcium signaling pathway                              | 0.000                   |
| hsa04151 | PI3K-Akt signaling pathway                             | 0.000                   |
| hsa05165 | Human papillomavirus infection                         | 0.000                   |
| hsa04725 | Cholinergic synapse                                    | 0.000                   |
| hsa05215 | Prostate cancer                                        | 0.000                   |
| hsa01522 | Endocrine resistance                                   | 0.000                   |
| hsa05230 | Central carbon metabolism in cancer                    | 0.000                   |
| hsa05223 | Non-small cell lung cancer                             | 0.000                   |
| hsa04510 | Focal adhesion                                         | 0.000                   |
| hsa05214 | Glioma                                                 | 0.000                   |
| hsa05212 | Pancreatic cancer                                      | 0.000                   |
| hsa04926 | Relaxin signaling pathway                              | 0.000                   |
| hsa04724 | Glutamatergic synapse                                  | 0.000                   |
| hsa04010 | MAPK signaling pathway                                 | 0.000                   |
| hsa05163 | Human cytomegalovirus infection                        | 0.000                   |
| hsa05218 | Melanoma                                               | 0.000                   |
| hsa04728 | Dopaminergic synapse                                   | 0.000                   |
| hsa04713 | Circadian entrainment                                  | 0.000                   |
| hsa04929 | GnRH secretion                                         | 0.000                   |
| hsa04371 | Apelin signaling pathway                               | 0.000                   |
| hsa05221 | Acute myeloid leukemia                                 | 0.000                   |
| hsa05161 | Hepatitis B                                            | 0.000                   |
| hsa04012 | ErbB signaling pathway                                 | 0.000                   |
| hsa04015 | Rap1 signaling pathway                                 | 0.000                   |
| hsa05224 | Breast cancer                                          | 0.000                   |
| hsa05226 | Gastric cancer                                         | 0.000                   |
| hsa04912 | GnRH signaling pathway                                 | 0.001                   |
| hsa05220 | Chronic myeloid leukemia                               | 0.001                   |
| hsa04730 | Long-term depression                                   | 0.001                   |
| hsa04930 | Type II diabetes mellitus                              | 0.001                   |
| hsa05231 | Choline metabolism in cancer                           | 0.001                   |
| hsa05205 | Proteoglycans in cancer                                | 0.001                   |
| hsa05146 | Amoebiasis                                             | 0.001                   |
| hsa04720 | Long-term potentiation                                 | 0.001                   |
| hsa05235 | PD-L1 expression and PD-1 checkpoint pathway in cancer | 0.002                   |
| hsa04066 | HIF-1 signaling pathway                                | 0.002                   |
| hsa01524 | Platinum drug resistance                               | 0.002                   |
| hsa04970 | Salivary secretion                                     | 0.002                   |
| hsa04923 | Regulation of lipolysis in adipocytes                  | 0.002                   |

|          |                                                      |       |
|----------|------------------------------------------------------|-------|
| hsa04210 | Apoptosis                                            | 0.002 |
| hsa04630 | JAK-STAT signaling pathway                           | 0.003 |
| hsa04722 | Neurotrophin signaling pathway                       | 0.003 |
| hsa05017 | Spinocerebellar ataxia                               | 0.003 |
| hsa04919 | Thyroid hormone signaling pathway                    | 0.003 |
| hsa04933 | AGE-RAGE signaling pathway in diabetic complications | 0.003 |
| hsa04213 | Longevity regulating pathway - multiple species      | 0.003 |
| hsa05225 | Hepatocellular carcinoma                             | 0.004 |
| hsa05167 | Kaposi sarcoma-associated herpesvirus infection      | 0.004 |
| hsa04972 | Pancreatic secretion                                 | 0.004 |
| hsa04611 | Platelet activation                                  | 0.004 |
| hsa04072 | Phospholipase D signaling pathway                    | 0.004 |
| hsa04723 | Retrograde endocannabinoid signaling                 | 0.004 |
| hsa04261 | Adrenergic signaling in cardiomyocytes               | 0.004 |
| hsa05210 | Colorectal cancer                                    | 0.005 |
| hsa04921 | Oxytocin signaling pathway                           | 0.005 |
| hsa04664 | Fc epsilon RI signaling pathway                      | 0.005 |
| hsa04540 | Gap junction                                         | 0.005 |
| hsa04211 | Longevity regulating pathway                         | 0.005 |
| hsa04014 | Ras signaling pathway                                | 0.005 |
| hsa05160 | Hepatitis C                                          | 0.005 |
| hsa04917 | Prolactin signaling pathway                          | 0.006 |
| hsa04140 | Autophagy - animal                                   | 0.006 |
| hsa04915 | Estrogen signaling pathway                           | 0.007 |
| hsa05418 | Fluid shear stress and atherosclerosis               | 0.007 |
| hsa04071 | Sphingolipid signaling pathway                       | 0.008 |
| hsa04062 | Chemokine signaling pathway                          | 0.008 |
| hsa04810 | Regulation of actin cytoskeleton                     | 0.008 |
| hsa04750 | Inflammatory mediator regulation of TRP channels     | 0.009 |
| hsa05100 | Bacterial invasion of epithelial cells               | 0.009 |
| hsa05033 | Nicotine addiction                                   | 0.009 |
| hsa05219 | Bladder cancer                                       | 0.010 |
| hsa05142 | Chagas disease                                       | 0.010 |
| hsa04662 | B cell receptor signaling pathway                    | 0.012 |
| hsa04150 | mTOR signaling pathway                               | 0.013 |
| hsa04068 | FoxO signaling pathway                               | 0.014 |
| hsa04931 | Insulin resistance                                   | 0.014 |
| hsa04911 | Insulin secretion                                    | 0.014 |
| hsa04512 | ECM-receptor interaction                             | 0.016 |
| hsa04973 | Carbohydrate digestion and absorption                | 0.016 |
| hsa05135 | Yersinia infection                                   | 0.017 |
| hsa04024 | cAMP signaling pathway                               | 0.017 |
| hsa05211 | Renal cell carcinoma                                 | 0.018 |
| hsa05131 | Shigellosis                                          | 0.018 |
| hsa04726 | Serotonergic synapse                                 | 0.019 |

| hsa05166 | Human T-cell leukemia virus 1 infection                  | 0.019            |
|----------|----------------------------------------------------------|------------------|
| hsa04550 | Signaling pathways regulating pluripotency of stem cells | 0.021            |
| hsa05414 | Dilated cardiomyopathy                                   | 0.023            |
| hsa04666 | Fc gamma R-mediated phagocytosis                         | 0.024            |
| hsa04925 | Aldosterone synthesis and secretion                      | 0.025            |
| hsa04971 | Gastric acid secretion                                   | 0.027            |
| hsa05412 | Arrhythmogenic right ventricular cardiomyopathy          | 0.028            |
| hsa05216 | Thyroid cancer                                           | 0.031            |
| hsa04625 | C-type lectin receptor signaling pathway                 | 0.033            |
| hsa04218 | Cellular senescence                                      | 0.034            |
| hsa04370 | VEGF signaling pathway                                   | 0.035            |
| hsa04922 | Glucagon signaling pathway                               | 0.037            |
| hsa04270 | Vascular smooth muscle contraction                       | 0.038            |
| hsa05132 | Salmonella infection                                     | 0.042            |
| hsa04742 | Taste transduction                                       | 0.043            |
| hsa04910 | Insulin signaling pathway                                | 0.043            |
| hsa05145 | Toxoplasmosis                                            | 0.045            |
| hsa05162 | Measles                                                  | 0.046            |
| hsa04927 | Cortisol synthesis and secretion                         | 0.048            |
| hsa04727 | GABAergic synapse                                        | 0.048            |
| ID       | Pathways for baseline mutated genes (96)                 | Adjusted P value |
| hsa05213 | Endometrial cancer                                       | 0.000            |
| hsa05222 | Small cell lung cancer                                   | 0.000            |
| hsa05165 | Human papillomavirus infection                           | 0.000            |
| hsa05215 | Prostate cancer                                          | 0.000            |
| hsa01521 | EGFR tyrosine kinase inhibitor resistance                | 0.000            |
| hsa01522 | Endocrine resistance                                     | 0.000            |
| hsa04151 | PI3K-Akt signaling pathway                               | 0.000            |
| hsa05230 | Central carbon metabolism in cancer                      | 0.000            |
| hsa05218 | Melanoma                                                 | 0.000            |
| hsa04725 | Cholinergic synapse                                      | 0.000            |
| hsa05214 | Glioma                                                   | 0.000            |
| hsa05212 | Pancreatic cancer                                        | 0.000            |
| hsa04935 | Growth hormone synthesis, secretion and action           | 0.000            |
| hsa04929 | GnRH secretion                                           | 0.000            |
| hsa05224 | Breast cancer                                            | 0.000            |
| hsa04510 | Focal adhesion                                           | 0.000            |
| hsa05223 | Non-small cell lung cancer                               | 0.000            |
| hsa05220 | Chronic myeloid leukemia                                 | 0.000            |
| hsa05226 | Gastric cancer                                           | 0.000            |
| hsa04010 | MAPK signaling pathway                                   | 0.000            |
| hsa04926 | Relaxin signaling pathway                                | 0.000            |
| hsa04012 | ErbB signaling pathway                                   | 0.000            |
| hsa05221 | Acute myeloid leukemia                                   | 0.000            |
| hsa05161 | Hepatitis B                                              | 0.000            |

|          |                                                        |       |
|----------|--------------------------------------------------------|-------|
| hsa04371 | Apelin signaling pathway                               | 0.000 |
| hsa05225 | Hepatocellular carcinoma                               | 0.000 |
| hsa04919 | Thyroid hormone signaling pathway                      | 0.000 |
| hsa05231 | Choline metabolism in cancer                           | 0.000 |
| hsa04213 | Longevity regulating pathway - multiple species        | 0.001 |
| hsa04728 | Dopaminergic synapse                                   | 0.001 |
| hsa05210 | Colorectal cancer                                      | 0.001 |
| hsa04210 | Apoptosis                                              | 0.001 |
| hsa04930 | Type II diabetes mellitus                              | 0.001 |
| hsa05163 | Human cytomegalovirus infection                        | 0.001 |
| hsa04211 | Longevity regulating pathway                           | 0.001 |
| hsa04720 | Long-term potentiation                                 | 0.001 |
| hsa04724 | Glutamatergic synapse                                  | 0.001 |
| hsa04664 | Fc epsilon RI signaling pathway                        | 0.001 |
| hsa05017 | Spinocerebellar ataxia                                 | 0.001 |
| hsa04912 | GnRH signaling pathway                                 | 0.001 |
| hsa04071 | Sphingolipid signaling pathway                         | 0.001 |
| hsa04722 | Neurotrophin signaling pathway                         | 0.001 |
| hsa01524 | Platinum drug resistance                               | 0.002 |
| hsa04020 | Calcium signaling pathway                              | 0.002 |
| hsa04015 | Rap1 signaling pathway                                 | 0.002 |
| hsa05146 | Amoebiasis                                             | 0.002 |
| hsa04923 | Regulation of lipolysis in adipocytes                  | 0.003 |
| hsa05166 | Human T-cell leukemia virus 1 infection                | 0.003 |
| hsa04630 | JAK-STAT signaling pathway                             | 0.003 |
| hsa04662 | B cell receptor signaling pathway                      | 0.003 |
| hsa05167 | Kaposi sarcoma-associated herpesvirus infection        | 0.003 |
| hsa04730 | Long-term depression                                   | 0.003 |
| hsa05033 | Nicotine addiction                                     | 0.003 |
| hsa04066 | HIF-1 signaling pathway                                | 0.003 |
| hsa04140 | Autophagy - animal                                     | 0.003 |
| hsa05219 | Bladder cancer                                         | 0.003 |
| hsa04915 | Estrogen signaling pathway                             | 0.003 |
| hsa05418 | Fluid shear stress and atherosclerosis                 | 0.003 |
| hsa04540 | Gap junction                                           | 0.004 |
| hsa05235 | PD-L1 expression and PD-1 checkpoint pathway in cancer | 0.004 |
| hsa05205 | Proteoglycans in cancer                                | 0.004 |
| hsa04072 | Phospholipase D signaling pathway                      | 0.005 |
| hsa04723 | Retrograde endocannabinoid signaling                   | 0.005 |
| hsa05211 | Renal cell carcinoma                                   | 0.005 |
| hsa04973 | Carbohydrate digestion and absorption                  | 0.005 |
| hsa04917 | Prolactin signaling pathway                            | 0.005 |
| hsa04611 | Platelet activation                                    | 0.006 |
| hsa04713 | Circadian entrainment                                  | 0.006 |
| hsa04150 | mTOR signaling pathway                                 | 0.006 |

| hsa04218 | Cellular senescence                                      | 0.006            |
|----------|----------------------------------------------------------|------------------|
| hsa05160 | Hepatitis C                                              | 0.006            |
| hsa04933 | AGE-RAGE signaling pathway in diabetic complications     | 0.007            |
| hsa05142 | Chagas disease                                           | 0.007            |
| hsa04014 | Ras signaling pathway                                    | 0.009            |
| hsa04910 | Insulin signaling pathway                                | 0.010            |
| hsa04931 | Insulin resistance                                       | 0.010            |
| hsa04370 | VEGF signaling pathway                                   | 0.012            |
| hsa05216 | Thyroid cancer                                           | 0.013            |
| hsa05131 | Shigellosis                                              | 0.013            |
| hsa04512 | ECM-receptor interaction                                 | 0.014            |
| hsa04970 | Salivary secretion                                       | 0.019            |
| hsa04062 | Chemokine signaling pathway                              | 0.021            |
| hsa04666 | Fc gamma R-mediated phagocytosis                         | 0.022            |
| hsa04750 | Inflammatory mediator regulation of TRP channels         | 0.023            |
| hsa04914 | Progesterone-mediated oocyte maturation                  | 0.025            |
| hsa04068 | FoxO signaling pathway                                   | 0.025            |
| hsa04625 | C-type lectin receptor signaling pathway                 | 0.029            |
| hsa04660 | T cell receptor signaling pathway                        | 0.029            |
| hsa05100 | Bacterial invasion of epithelial cells                   | 0.033            |
| hsa05412 | Arrhythmogenic right ventricular cardiomyopathy          | 0.033            |
| hsa04550 | Signaling pathways regulating pluripotency of stem cells | 0.037            |
| hsa05145 | Toxoplasmosis                                            | 0.039            |
| hsa04810 | Regulation of actin cytoskeleton                         | 0.041            |
| hsa04726 | Serotonergic synapse                                     | 0.043            |
| hsa04261 | Adrenergic signaling in cardiomyocytes                   | 0.045            |
| hsa04742 | Taste transduction                                       | 0.048            |
| ID       | Pathways for mutated genes after chemotherapy (97)       | Adjusted P value |
| hsa05222 | Small cell lung cancer                                   | 0.000            |
| hsa04725 | Cholinergic synapse                                      | 0.000            |
| hsa05213 | Endometrial cancer                                       | 0.000            |
| hsa04935 | Growth hormone synthesis, secretion and action           | 0.000            |
| hsa04926 | Relaxin signaling pathway                                | 0.000            |
| hsa04151 | PI3K-Akt signaling pathway                               | 0.000            |
| hsa05230 | Central carbon metabolism in cancer                      | 0.000            |
| hsa04020 | Calcium signaling pathway                                | 0.000            |
| hsa01522 | Endocrine resistance                                     | 0.000            |
| hsa01521 | EGFR tyrosine kinase inhibitor resistance                | 0.000            |
| hsa05221 | Acute myeloid leukemia                                   | 0.000            |
| hsa05235 | PD-L1 expression and PD-1 checkpoint pathway in cancer   | 0.000            |
| hsa04371 | Apelin signaling pathway                                 | 0.000            |
| hsa05218 | Melanoma                                                 | 0.001            |
| hsa05223 | Non-small cell lung cancer                               | 0.001            |
| hsa05163 | Human cytomegalovirus infection                          | 0.001            |
| hsa05214 | Glioma                                                   | 0.001            |



|          |                                                      |       |
|----------|------------------------------------------------------|-------|
| hsa05215 | Prostate cancer                                      | 0.001 |
| hsa04510 | Focal adhesion                                       | 0.001 |
| hsa05212 | Pancreatic cancer                                    | 0.001 |
| hsa04923 | Regulation of lipolysis in adipocytes                | 0.001 |
| hsa05165 | Human papillomavirus infection                       | 0.001 |
| hsa04015 | Rap1 signaling pathway                               | 0.001 |
| hsa04213 | Longevity regulating pathway - multiple species      | 0.001 |
| hsa04012 | ErbB signaling pathway                               | 0.001 |
| hsa04066 | HIF-1 signaling pathway                              | 0.001 |
| hsa04929 | GnRH secretion                                       | 0.001 |
| hsa04210 | Apoptosis                                            | 0.001 |
| hsa04930 | Type II diabetes mellitus                            | 0.001 |
| hsa04211 | Longevity regulating pathway                         | 0.001 |
| hsa04724 | Glutamatergic synapse                                | 0.001 |
| hsa04010 | MAPK signaling pathway                               | 0.001 |
| hsa04722 | Neurotrophin signaling pathway                       | 0.002 |
| hsa05205 | Proteoglycans in cancer                              | 0.002 |
| hsa04919 | Thyroid hormone signaling pathway                    | 0.002 |
| hsa05226 | Gastric cancer                                       | 0.002 |
| hsa01524 | Platinum drug resistance                             | 0.002 |
| hsa04713 | Circadian entrainment                                | 0.002 |
| hsa05231 | Choline metabolism in cancer                         | 0.002 |
| hsa04933 | AGE-RAGE signaling pathway in diabetic complications | 0.002 |
| hsa05220 | Chronic myeloid leukemia                             | 0.002 |
| hsa05146 | Amoebiasis                                           | 0.002 |
| hsa04728 | Dopaminergic synapse                                 | 0.003 |
| hsa05161 | Hepatitis B                                          | 0.003 |
| hsa04931 | Insulin resistance                                   | 0.003 |
| hsa04140 | Autophagy - animal                                   | 0.003 |
| hsa05225 | Hepatocellular carcinoma                             | 0.003 |
| hsa05418 | Fluid shear stress and atherosclerosis               | 0.003 |
| hsa05210 | Colorectal cancer                                    | 0.004 |
| hsa05224 | Breast cancer                                        | 0.005 |
| hsa04664 | Fc epsilon RI signaling pathway                      | 0.005 |
| hsa04912 | GnRH signaling pathway                               | 0.005 |
| hsa04970 | Salivary secretion                                   | 0.005 |
| hsa04917 | Prolactin signaling pathway                          | 0.006 |
| hsa04024 | cAMP signaling pathway                               | 0.006 |
| hsa04611 | Platelet activation                                  | 0.006 |
| hsa04921 | Oxytocin signaling pathway                           | 0.006 |
| hsa05166 | Human T-cell leukemia virus 1 infection              | 0.006 |
| hsa04150 | mTOR signaling pathway                               | 0.006 |
| hsa04062 | Chemokine signaling pathway                          | 0.008 |
| hsa05167 | Kaposi sarcoma-associated herpesvirus infection      | 0.008 |
| hsa05142 | Chagas disease                                       | 0.008 |

|          |                                                          |       |
|----------|----------------------------------------------------------|-------|
| hsa04068 | FoxO signaling pathway                                   | 0.008 |
| hsa05100 | Bacterial invasion of epithelial cells                   | 0.008 |
| hsa04014 | Ras signaling pathway                                    | 0.009 |
| hsa05135 | Yersinia infection                                       | 0.010 |
| hsa04662 | B cell receptor signaling pathway                        | 0.011 |
| hsa04550 | Signaling pathways regulating pluripotency of stem cells | 0.012 |
| hsa04370 | VEGF signaling pathway                                   | 0.012 |
| hsa05216 | Thyroid cancer                                           | 0.013 |
| hsa04072 | Phospholipase D signaling pathway                        | 0.014 |
| hsa04727 | GABAergic synapse                                        | 0.015 |
| hsa04261 | Adrenergic signaling in cardiomyocytes                   | 0.015 |
| hsa04071 | Sphingolipid signaling pathway                           | 0.015 |
| hsa04810 | Regulation of actin cytoskeleton                         | 0.015 |
| hsa05160 | Hepatitis C                                              | 0.019 |
| hsa04720 | Long-term potentiation                                   | 0.019 |
| hsa05414 | Dilated cardiomyopathy                                   | 0.020 |
| hsa04666 | Fc gamma R-mediated phagocytosis                         | 0.021 |
| hsa05211 | Renal cell carcinoma                                     | 0.021 |
| hsa04750 | Inflammatory mediator regulation of TRP channels         | 0.021 |
| hsa04914 | Progesterone-mediated oocyte maturation                  | 0.023 |
| hsa04972 | Pancreatic secretion                                     | 0.025 |
| hsa04973 | Carbohydrate digestion and absorption                    | 0.026 |
| hsa04625 | C-type lectin receptor signaling pathway                 | 0.027 |
| hsa04915 | Estrogen signaling pathway                               | 0.029 |
| hsa05162 | Measles                                                  | 0.030 |
| hsa05412 | Arrhythmogenic right ventricular cardiomyopathy          | 0.030 |
| hsa05132 | Salmonella infection                                     | 0.031 |
| hsa05017 | Spinocerebellar ataxia                                   | 0.033 |
| hsa04668 | TNF signaling pathway                                    | 0.036 |
| hsa04723 | Retrograde endocannabinoid signaling                     | 0.039 |
| hsa04726 | Serotonergic synapse                                     | 0.039 |
| hsa04742 | Taste transduction                                       | 0.043 |
| hsa04911 | Insulin secretion                                        | 0.043 |
| hsa04512 | ECM-receptor interaction                                 | 0.047 |
| hsa04218 | Cellular senescence                                      | 0.048 |

---

Pathways were ranked according to statistical significance.
